# Supplementary material for: A Tiny Change Makes a Big Difference in the Anti-Parasitic Activities of an HDAC Inhibitor
Source: MDPI journal article supplement (doi:10.3390/ijms20122973), 2019-06-18
Supplement: s1 [file s1]

## High pressure chromatography, mass spectrometry and nuclear magnetic resonance of 363 (A) and D16 (B).

A

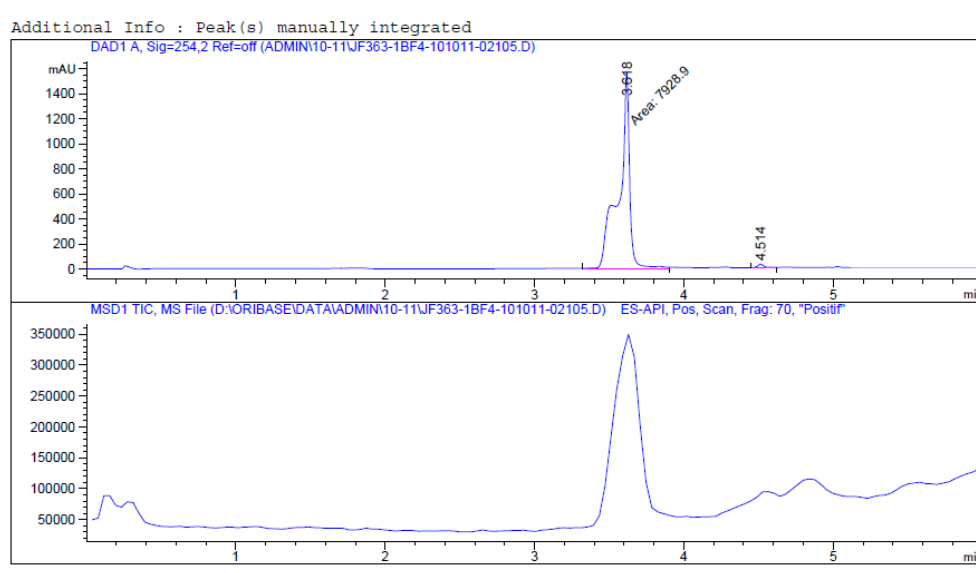

### High Pressure Liquid Chromatography (HPLC) of 363

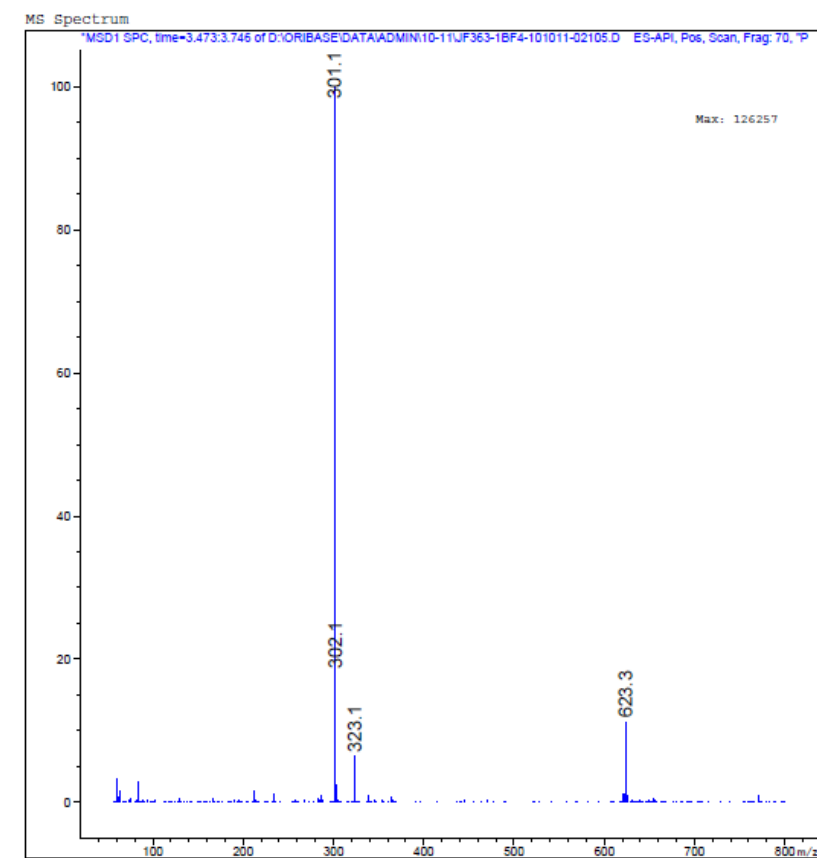

### Mass Spectrometry (MS) of 363

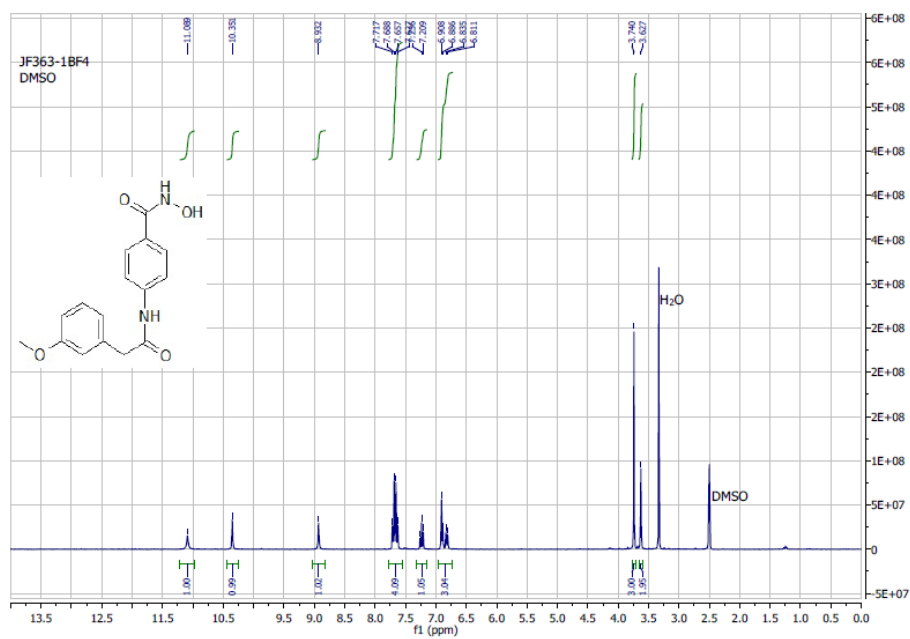

Nuclear Magnetic Resonance (NMR) of 363

**B**

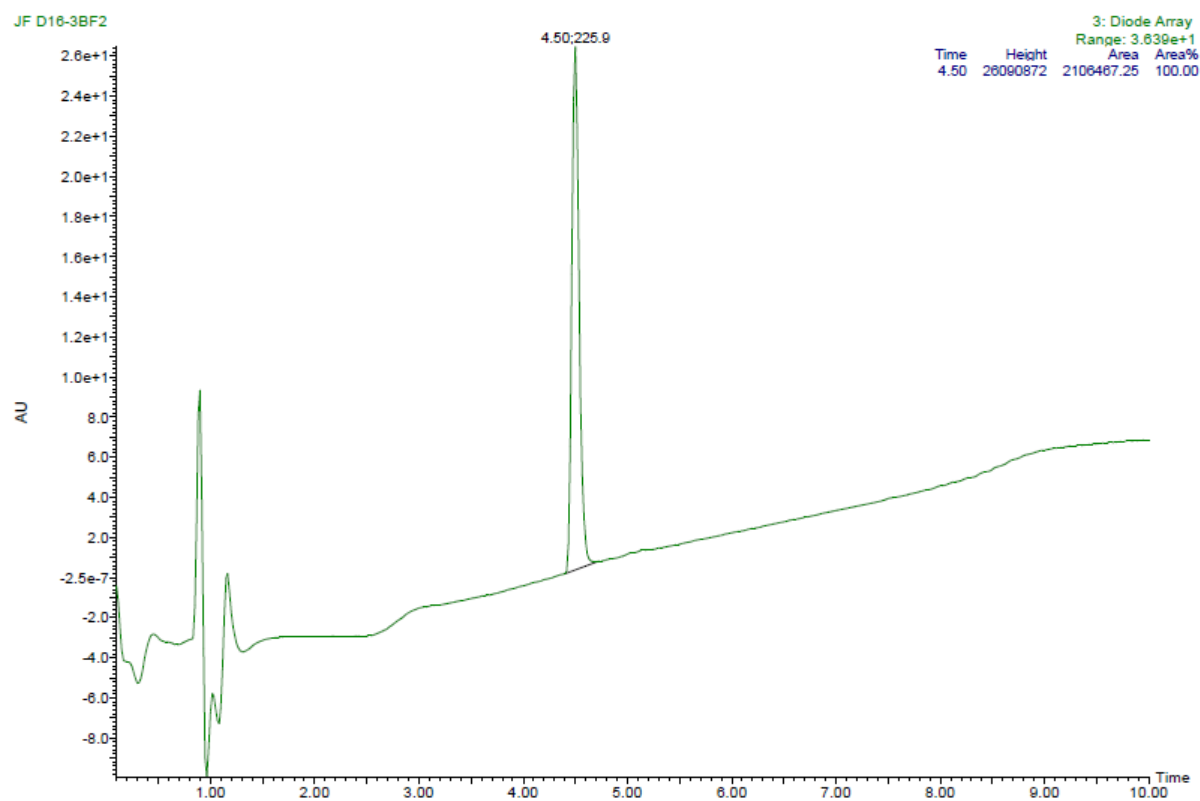

High Pressure Liquid Chromatography (HPLC) of **D16**

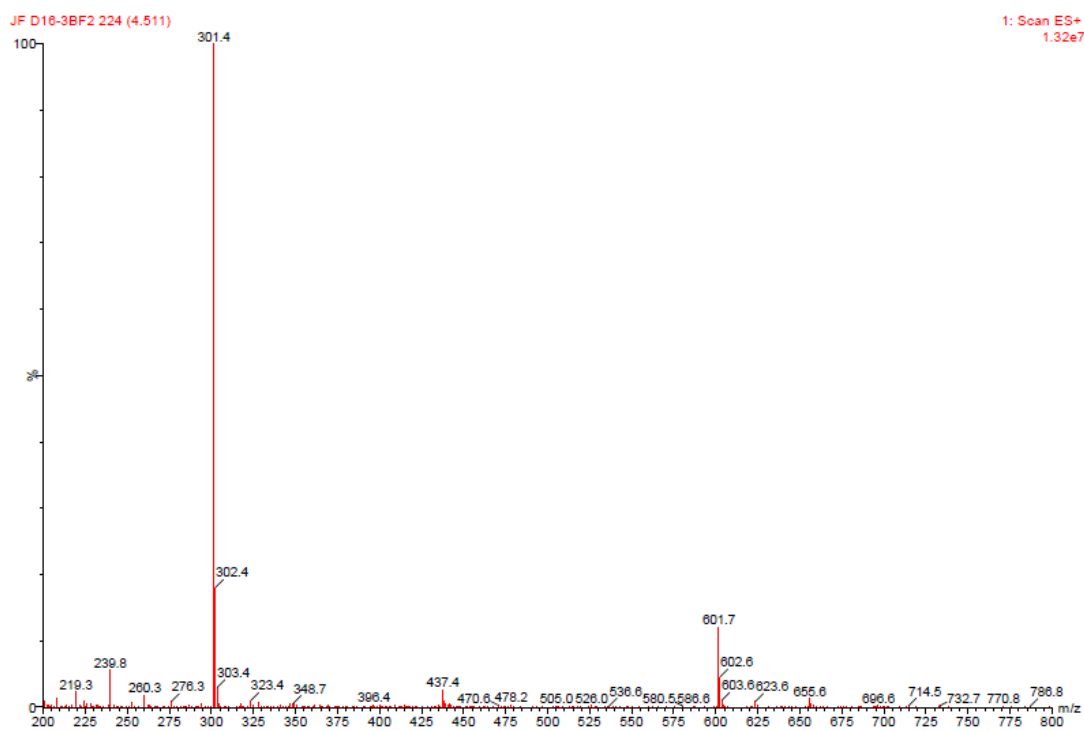

Mass Spectrometry (MS) of **D16**

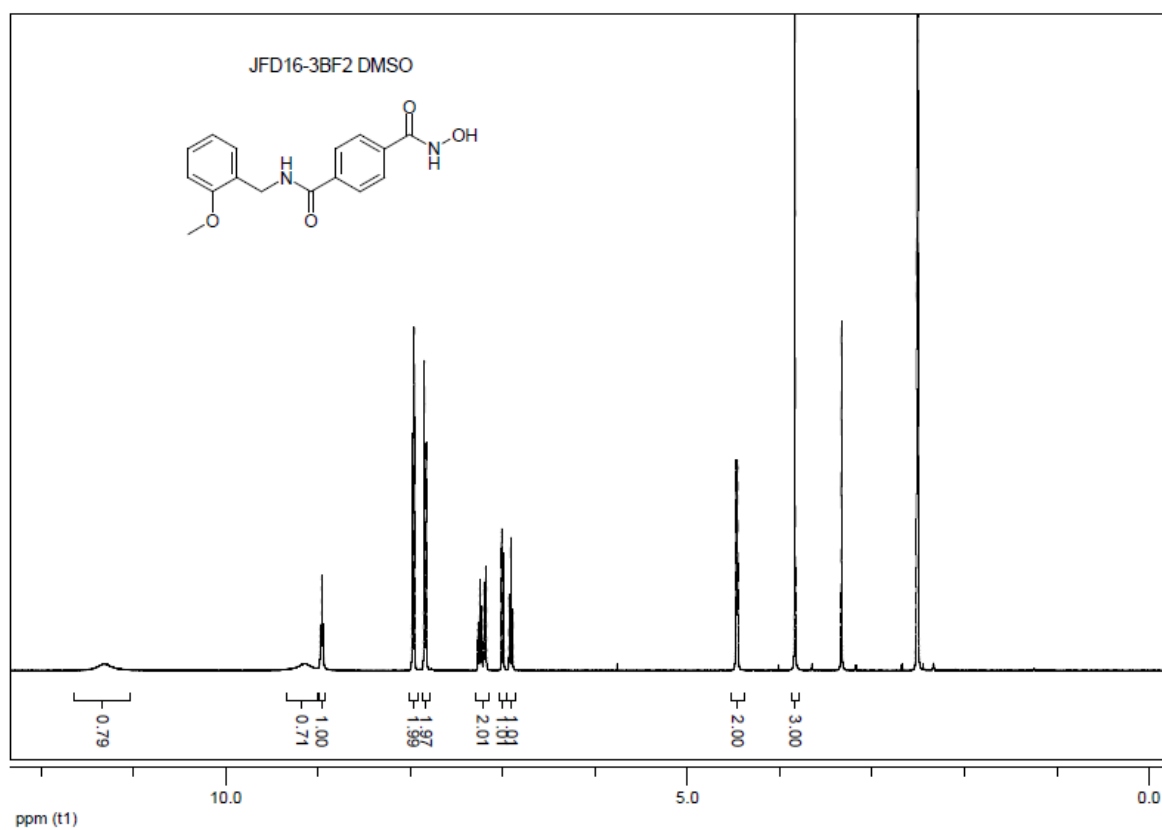

Nuclear Magnetic Resonance (NMR) of **D16**
